# Supplementary material
Source: MDPI journal article supplement (https://www.mdpi.com/2411-5150/8/2/25)
Supplement: s1 [file s1]

## Supplementary Materials

**Table S1.** Measures obtained from the Paired Associates Learning (PAL) test, presented as Mean  $\pm$  SD of the Raw Score.

| Type      | Pre-treatment<br><i>Mean(SD)</i> | Post-treatment<br><i>Mean(SD)</i> | Participants<br><i>N</i> | Test statistics |          |          |
|-----------|----------------------------------|-----------------------------------|--------------------------|-----------------|----------|----------|
|           |                                  |                                   |                          | <i>Ties</i>     | <i>Z</i> | <i>P</i> |
| PALTEA28  | 53.45(10.29)                     | 56.83 $\pm$ 10.52                 | 29                       | 0               | -1.5468  | 0.0610   |
| PALTA28   | 7.21(2.55)                       | 6.83(1.64)                        | 26                       | 3               | 0.6740   | 0.2501   |
| PALFAMS28 | 3.69(0.47)                       | 2.83(0.56)                        | 21                       | 8               | 1.4664   | 0.0713   |
| PALMETS28 | 2.10(2.49)                       | 2.35(1.83)                        | 19                       | 10              | 0.0716   | 0.4714   |
| PALNPR28  | 5.24(1.88)                       | 4.55(1.40)                        | 16                       | 13              | 1.6846   | 0.0460   |
| PALTEA2   | 1.52(2.27)                       | 2.21(2.33)                        | 20                       | 9               | -0.9600  | 0.1685   |
| PALTEA4   | 7.48(4.90)                       | 9.14(4.42)                        | 25                       | 4               | -1.8260  | 0.0339   |
| PALTEA6   | 17.14(4.42)                      | 17.72(4.50)                       | 16                       | 13              | -0.8548  | 0.1963   |
| PALTEA8   | 27.31(2.46)                      | 27.76(1.29)                       | 4                        | 25              | 0.2981   | 0.3125   |
| PALTE28   | 17.55(8.44)                      | 15.34(5.95)                       | 27                       | 2               | 1.1299   | 0.1292   |
| PALTE2    | 1.52(2.27)                       | 2.21(2.33)                        | 21                       | 8               | 0.9600   | 0.1685   |
| PALTE4    | 7.03(4.97)                       | 7.79(5.00)                        | 26                       | 3               | -0.8158  | 0.2073   |
| PALTE6    | 6.79(7.85)                       | 4.62(7.21)                        | 17                       | 12              | 1.1604   | 0.1229   |
| PALTA2    | 1.83(1.22)                       | 2.31(1.16)                        | 20                       | 9               | -1.4759  | 0.0700   |
| PALTA4    | 2.93(1.22)                       | 3.10(1.39)                        | 17                       | 12              | -0.5743  | 0.2829   |
| PALTA6    | 2.07(2.03)                       | 1.28(1.86)                        | 12                       | 17              | 0.3058   | 0.0730   |
| PALTA8    | 0.41(1.23)                       | 0.14(0.74)                        | 4                        | 25              |          | 0.3125   |
| PALTA12   | 0.14(0.74)                       | 0.00(0)                           | 1                        | 28              |          | 0.5000   |

**Table S2.** Measures obtained from the Motor Screening Task (MOT) and Pattern Recognition Memory (PRM) test, presented as Mean  $\pm$  SD of the Raw Score.

| Type     | Pre-treatment<br><i>Mean(SD)</i> | Post-treatment<br><i>Mean(SD)</i> | Participants<br><i>N</i> | Test statistics |          |          |
|----------|----------------------------------|-----------------------------------|--------------------------|-----------------|----------|----------|
|          |                                  |                                   |                          | <i>Ties</i>     | <i>Z</i> | <i>P</i> |
| MOTML    | 1119.64(517.89)                  | 1015.88(471.10)                   | 29                       | 0               | 1.600    | 0.0548   |
| MOTS DL  | 376.48(420.68)                   | 282.91(346.31)                    | 29                       | 0               | 0.5348   | 0.2963   |
| PRMPCI   | 61.54(14.90)                     | 64.18(13.24)                      | 27                       | 1               | -0.8742  | 0.1910   |
| PRMMCLI  | 4828.85(2994.38)                 | 3859.55(2426.25)                  | 26                       | 0               | 0.7873   | 0.2155   |
| PRMMDCLI | 3739.90(2492.51)                 | 3279.90(2684.65)                  | 26                       | 0               | 0.5842   | 0.2796   |
| PRMCLSDI | 4570 (8977.97)                   | 2513.36(2019.01)                  | 26                       | 0               | 0.4318   | 0.3329   |

**Table S3.** Measures obtained from the Reaction Time (RTI) test, presented as Mean  $\pm$  SD of the Raw Score.

| Type     | Pre-treatment  | Post-treatment | Participants | Test statistics |         |        |
|----------|----------------|----------------|--------------|-----------------|---------|--------|
|          | Mean(SD)       | Mean(SD)       |              | Ties            | Z       | P      |
| RTISMRT  | 471.22(132.66) | 526.58(187.65) | 28           | 0               | -0.8767 | 0.1903 |
| RTISMDRT | 429.80(96.19)  | 458.79(144.16) | 27           | 1               | -0.3244 | 0.3728 |
| RTISRTSD | 137.35(144.25) | 213.37(224.78) | 28           | 0               | -1.3695 | 0.0854 |
| RTISMMT  | 340.25(132.58) | 369.47(148.22) | 28           | 0               | -0.8881 | 0.1872 |
| RTISMDMT | 323.52(133.32) | 351.55(147.15) | 28           | 0               | -0.7401 | 0.2296 |
| RTISMTSD | 89.48(152.67)  | 100.84(102.47) | 28           | 0               | -1.7192 | 0.0428 |
| RTIFMRT  | 530.25(165.21) | 499.03(109.87) | 28           | 0               | -0.1252 | 0.5498 |
| RTIFMDRT | 484.93(98.09)  | 480.59(96.38)  | 29           | 0               | 0.2733  | 0.3922 |
| RTIFRTSD | 149.72(234.69) | 104.07(69.43)  | 28           | 0               | 0.8116  | 0.2084 |
| RTIFMMT  | 377.74(159.46) | 388.58(137.90) | 29           | 0               | -0.1936 | 0.4233 |
| RTIFMDMT | 365.24(171.22) | 381.95(135.11) | 29           | 0               | -0.2162 | 0.4144 |
| RTIFMTSD | 73.79(80.04)   | 72.57(55.26)   | 28           | 0               | -1.0133 | 0.1555 |
| RTISES   | 6.10(5.63)     | 6.93(5.06)     | 28           | 0               | -1.0621 | 0.1441 |
| RTISESI  | 2.52(3.00)     | 2.69(4.05)     | 21           | 8               | -0.0702 | 0.4720 |
| RTISESPR | 1.72(2.63)     | 2.66(2.06)     | 25           | 4               | -2.0286 | 0.0213 |
| RTISESNR | 0.55(0.95)     | 0.59(1.18)     | 13           | 16              |         | 0.4054 |
| RTIFES   | 4.45(4.89)     | 3.66(5.18)     | 23           | 6               | 0.7173  | 0.2366 |
| RTIFESI  | 1.90(1.84)     | 1.07(1.56)     | 17           | 12              | 1.9365  | 0.0264 |
| RTIFESNR | 0.38(1.05)     | 0.38(0.73)     | 7            | 22              |         | 0.4219 |
| RTIFESPR | 0.93(1.62)     | 0.97(2.26)     | 18           | 11              | 0.1113  | 0.4557 |

**Table S4.** Measures obtained from the Spatial Working Memory (SWM) test, presented as Mean  $\pm$  SD of the Raw Score.

| Type     | Pre-treatment | Post-treatment | Participants | Test statistics |         |               |
|----------|---------------|----------------|--------------|-----------------|---------|---------------|
|          | Mean(SD)      | Mean(SD)       |              | Ties            | Z       | P             |
| SWMTE468 | 25.52(10.24)  | 23.69(8.06)    | 28           | 1               | 0.6729  | 0.2505        |
| SWMBE468 | 24.52(8.78)   | 22.83(7.52)    | 27           | 2               | 0.7585  | 0.2241        |
| SWMWE468 | 3.69(6.69)    | 2.38(3.70)     | 23           | 6               | 0.8100  | 0.2090        |
| SWMDE468 | 2.52(4.709)   | 1.42(2.81)     | 19           | 10              | 1.2057  | 0.1140        |
| SWMBE4   | 2.34(1.72)    | 1.90(1.47)     | 22           | 7               | 1.0032  | 0.1579        |
| SWMWE4   | 0.24(0.83)    | 0.24(0.51)     | 7            | 22              |         | 0.6094        |
| SWMTE6   | 6.93(4.15)    | 7.76(4.64)     | 26           | 3               | 1.4300  | 0.9236        |
| SWMBE6   | 6.62(3.55)    | 7.52(4.32)     | 26           | 3               | -1.3391 | 0.0903        |
| SWMDE6   | 0.83(1.89)    | 0.83(2.17)     | 12           | 17              |         | 0.4363        |
| SWMTE4   | 2.41(1.86)    | 2.07(1.65)     | 23           | 6               | 0.6480  | 0.2585        |
| SWMTE8   | 16.17(5.98)   | 13.86(3.93)    | 26           | 3               | 1.4756  | 0.0700        |
| SWMBE8   | 16.04(4.55)   | 13.57(3.76)    | 26           | 3               | 1.6287  | 0.0517        |
| SWMWE8   | 2.31(3.92)    | 1.07(1.60)     | 22           | 7               | 1.4228  | 0.0774        |
| SWMDE8   | 1.69(2.85)    | 0.62(1.15)     | 18           | 11              | 1.8728  | <b>0.0305</b> |
| SWMTE12  | 46.97(13.25)  | 46.71(13.64)   | 29           | 0               | 0.2963  | 0.3835        |
| SWMBE12  | 44.82(11.30)  | 43.89(11.42)   | 26           | 3               | 0.5593  | 0.2880        |
| SWMWE12  | 10.57(10.73)  | 10.04(9.20)    | 23           | 6               | 0.1369  | 0.5545        |
| SWMS6    | 4.03(0.73)    | 4.10(0.86)     | 17           | 12              | -0.3803 | 0.3519        |
| SWMS     | 9.55(1.33)    | 9.52(1.27)     | 20           | 9               | -0.0965 | 0.5385        |
| SWMSX    | 17.29(2.11)   | 17.64(2.04)    | 25           | 4               | -0.6326 | 0.2635        |

**Table S5.** Measures obtained from the Delayed Matching to Sample (DMS) test, presented as Mean  $\pm$  SD of the Raw Score.

| Type     | Pre-treatment     | Post-treatment    | Participants | Test statistics |         |        |
|----------|-------------------|-------------------|--------------|-----------------|---------|--------|
|          | Mean(SD)          | Mean(SD)          |              | Ties            | Z       | P      |
| DMSTC    | 11.46(4.00)       | 11.86(3.47)       | 26           | 3               | −0.4612 | 0.3223 |
| DMSPCAD  | 48.57(20.31)      | 50.54(20.71)      | 27           | 2               | −0.5350 | 0.2963 |
| DMSPCS   | 76.43(32.23)      | 80.00(21.77)      | 19           | 10              | −0.2473 | 0.4023 |
| DMSPC0   | 61.43(27.18)      | 63.57(26.14)      | 18           | 11              | −0.2105 | 0.4166 |
| DMSPC4   | 49.29(23.40)      | 47.14(25.07)      | 19           | 10              | 0.3493  | 0.3634 |
| DMSPC12  | 42.14(24.55)      | 46.43(23.76)      | 20           | 9               | −0.8708 | 0.1919 |
| DMSTE    | 9.82(10.46)       | 8.17(3.41)        | 26           | 3               | 0.1898  | 0.4247 |
| DMSTEC   | 2.68(2.04)        | 2.39(2.08)        | 24           | 5               | 0.6099  | 0.2709 |
| DMSTEP   | 3.82(2.31)        | 4.07(1.80)        | 24           | 5               | −0.4780 | 0.3163 |
| DMSTEAD  | 6.82(2.89)        | 7.17(2.82)        | 26           | 3               | −0.1662 | 0.4340 |
| DMSTECAD | 2.43(1.71)        | 2.18(1.74)        | 22           | 7               | 0.7001  | 0.2419 |
| DMSTEPAD | 3.32(2.11)        | 3.36(1.54)        | 22           | 7               | −0.0327 | 0.5131 |
| DMSTEDAD | 1.07(1.02)        | 1.61(1.59)        | 24           | 5               | −1.2833 | 0.0997 |
| DMSML    | 4807.77(2558.14)  | 5415.50(1901.22)  | 29           | 0               | −1.2325 | 0.1089 |
| DMSMDL   | 4161.64(2,045.21) | 4689.95(1,646.82) | 29           | 0               | −1.1272 | 0.1298 |
| DMSLSD   | 2708.73(1855.46)  | 2601.85(2138.46)  | 29           | 0               | 0.8289  | 0.2036 |
| DMSMLAD  | 5060.14(2,322.13) | 5573.61(2,562.58) | 29           | 0               | −0.4204 | 0.3371 |
| DMSMDLAD | 4029.54(1847.66)  | 5012.40(2326.16)  | 29           | 0               | −1.3334 | 0.0912 |
| DMSMLS   | 5234.83(3025.82)  | 4904.06(1665.76)  | 29           | 0               | −0.2286 | 0.5904 |
| DMSMDLS  | 5028.47(3006.56)  | 4686.94(1874.77)  | 29           | 0               | −0.0762 | 0.5304 |
| DMSLSSD  | 2189.48(1970.48)  | 1939.31(1323.16)  | 29           | 0               | 0.3286  | 0.3712 |
| DMSML0   | 3779.98(1180.21)  | 4937.99(2407.30)  | 29           | 0               | −1.6217 | 0.0524 |
| DMSL0SD  | 1786.08(1280.64)  | 2159.71(2214.57)  | 29           | 0               | −0.2597 | 0.3975 |
| DMSML4   | 5449.22(3295.56)  | 5348.22(1999.81)  | 29           | 0               | −0.4843 | 0.3141 |
| DMSMDL4  | 5338.40(3366.93)  | 5099.68(2040.76)  | 29           | 0               | −0.7534 | 0.2256 |
| DMSL4SD  | 2834.80(3147.16)  | 1991.29(1431.78)  | 29           | 0               | 0.8710  | 0.1919 |
| DMSML12  | 6730.57(3673.68)  | 6598.63(4382.03)  | 29           | 0               | 0.8429  | 0.1997 |
| DMSL12SD | 3135.32(3012.96)  | 2838.02(5176.16)  | 29           | 0               | 1.0083  | 0.1567 |
| DMSCC    | 1.61(0.47)        | 1.69(0.39)        | 27           | 2               | −0.8269 | 0.2041 |
| DMSPEGE  | 0.38(0.19)        | 0.36(0.22)        | 25           | 4               | 0.2818  | 0.3891 |
| DMSPEGC  | 0.45(0.22)        | 0.43(0.22)        | 26           | 3               | 0.1217  | 0.4516 |
